# Supplementary material
Source: PubMed Central journal article supplement (PMC5147691)
Supplement: 13197_2016_2339_MOESM1_ESM.pdf [file 13197_2016_2339_MOESM1_ESM.pdf]

**Supplementary Table 1** Lycopene retention of osmotically dehydrated cherry tomatoes dried at different temperatures to reach water content of 20% (wet basis) and the corresponding energy consumption

|                           | 50 °C                   | 60 °C                   | 70 °C                   | 80 °C                   |
|---------------------------|-------------------------|-------------------------|-------------------------|-------------------------|
| Lycopene retention (%)    | 80.65±1.05 <sup>a</sup> | 71.03±2.56 <sup>b</sup> | 61.80±2.98 <sup>c</sup> | 50.93±3.12 <sup>d</sup> |
| Energy consumption (kw h) | 21.25±0.73 <sup>a</sup> | 15.30±1.06 <sup>b</sup> | 10.20±0.90 <sup>d</sup> | 12.80±0.85 <sup>c</sup> |

Data were mean value of three replicates ± standard deviation.

Values followed by different letters in each column indicated significant differences ( $p<0.05$ ).

**Supplementary Table 2** Models developed using response surface methodology to predict physicochemical and microbiological parameters of partially dried cherry tomatoes during storage

| Parameter           | Equation                                                                                                                                                                                                                                              |
|---------------------|-------------------------------------------------------------------------------------------------------------------------------------------------------------------------------------------------------------------------------------------------------|
| Lycopene            | $y = 84.25092 + 144.99301 \times x_1 + 1.78644 \times x_2 - 0.04271 \times x_3$ $- 1.12924 \times x_1x_2 - 0.82204 \times x_1x_3 - 0.01406 \times x_2x_3$ $- 0.03000 \times x_2^2 + 1.63492 \times 10^{-4} \times x_3^2$                              |
| Total phenolics     | $y = -158.99183 + 584.49199 \times x_1 + 1.92820 \times x_2 + 0.84300 \times x_3$ $- 1.57471 \times x_1x_2 - 1.82860 \times x_1x_3 - 0.02917 \times x_2x_3$ $- 0.02428 \times x_2^2 + 2.21458 \times 10^{-3} \times x_3^2$                            |
| $L^*$               | $y = 32.83311 - 4.39096 \times x_1 - 0.13403 \times x_2 - 0.22600 \times x_3 + 0.20387$ $\times x_1x_2 + 0.21530 \times x_1x_3 - 1.58236 \times 10^{-3} \times x_2x_3$ $+ 3.97596 \times 10^{-4} \times x_2^2 + 5.84127 \times 10^{-4} \times x_3^2$  |
| $a^*$               | $y = 17.08184 - 6.95317 \times x_1 - 0.01932 \times x_2 - 0.20122 \times x_3 + 0.13887$ $\times x_1x_2 + 0.21403 \times x_1x_3 - 2.63798 \times 10^{-3} \times x_2x_3$ $- 1.93413 \times 10^{-3} \times x_2^2 - 4.60317 \times 10^{-5} \times x_3^2$  |
| Aerobic plate count | $y = -0.70118 + 1.06184 \times x_1 + 0.01410 \times x_2 + 0.10753 \times x_3 - 0.01445$ $\times x_1x_2 + 0.02139 \times x_1x_3 + 7.80740 \times 10^{-5} \times x_2x_3$ $+ 9.11740 \times 10^{-5} \times x_2^2 - 1.39703 \times 10^{-3} \times x_3^2$  |
| Yeasts and molds    | $y = -1.93226 + 2.43316 \times x_1 + 0.028608 \times x_2 + 0.09168 \times x_3 - 0.02659$ $\times x_1x_2 + 0.01965 \times x_1x_3 + 1.78425 \times 10^{-4} \times x_2x_3$ $+ 2.74498 \times 10^{-5} \times x_2^2 - 1.18633 \times 10^{-3} \times x_3^2$ |

$x_1$ : water activity of partially dried cherry tomato,  $x_2$ : storage temperature,  $x_3$ : storage time

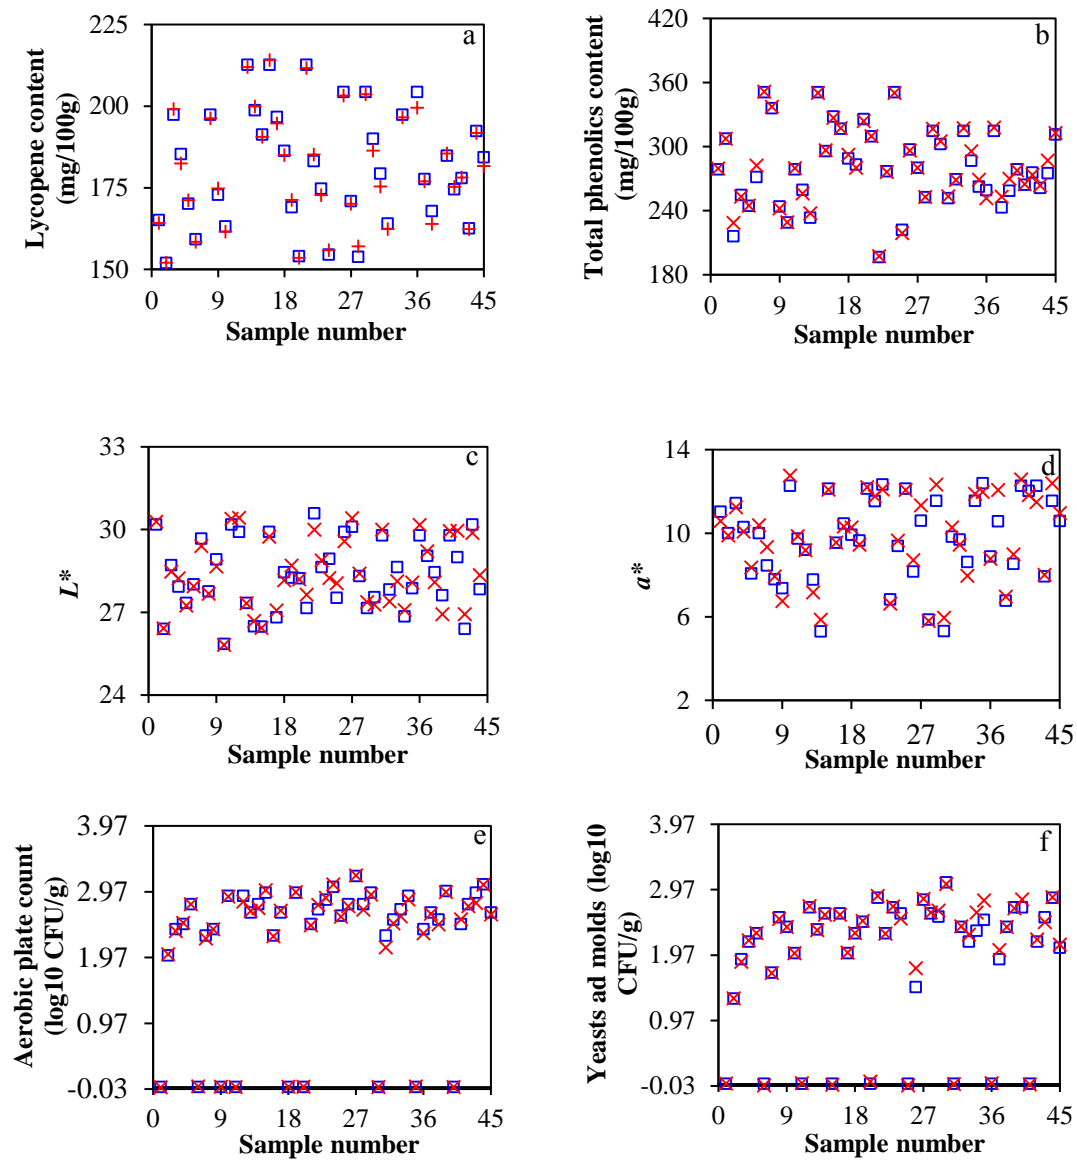

**Supplementary Fig. 1** Comparisons of experimental and predicted output values from ANFIS models (a: lycopene; b: total phenolics, c:  $L^*$ ; d:  $a^*$ ; e: aerobic plate count; f: yeasts and molds).  $\square$ : experimental results;  $\times$ : ANFIS predicted results

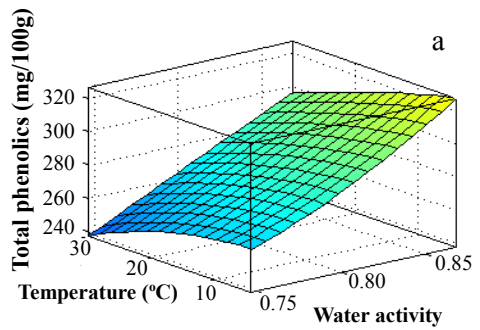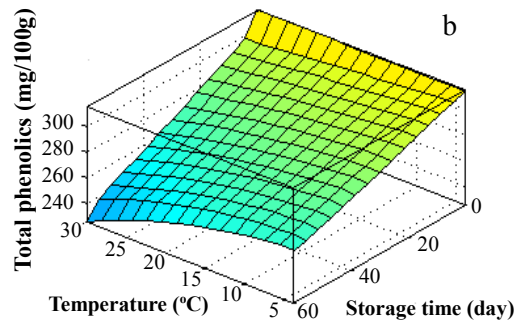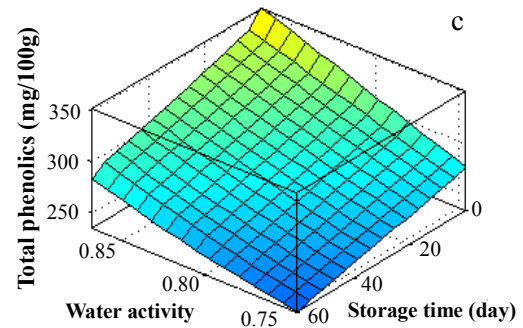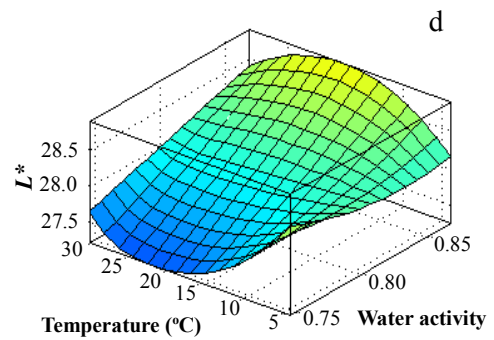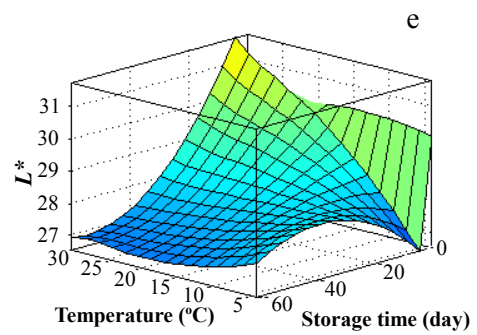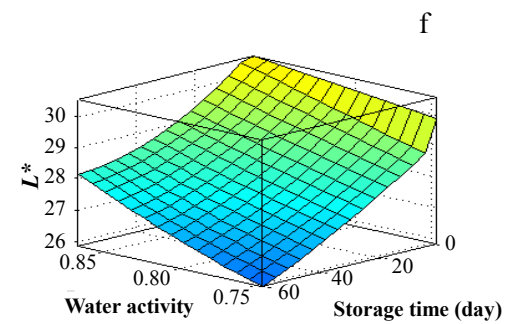

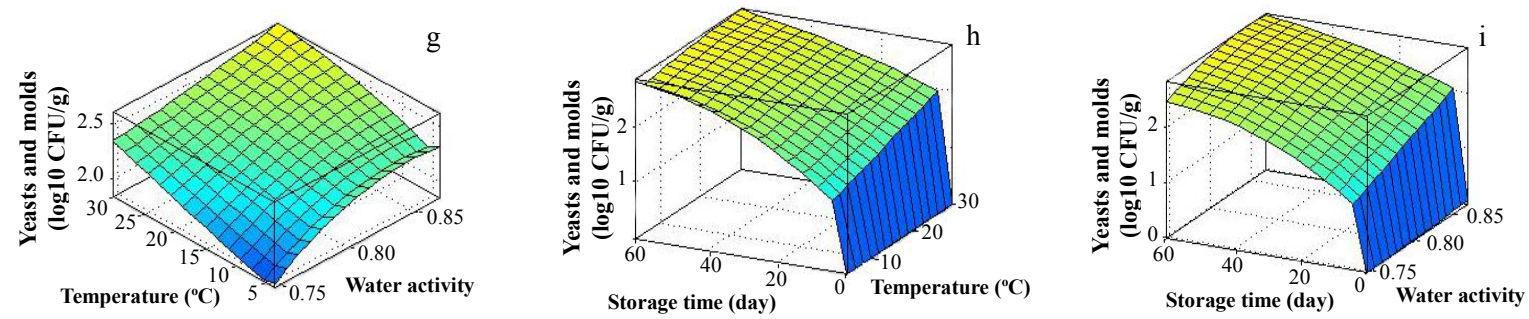

**Supplementary Fig. 2** 3D surface plots of total phenolic content (a-c),  $L^*$  (d-f) and number of yeasts and molds (g-i) of partially dried cherry tomatoes versus storage conditions
